# Supplementary material
Source: Elsevier journal article supplement (https://www.sciencedirect.com/science/article/pii/S2255553618301137)
Supplement: mmc1 [file S2255553618301137:mmc1.docx]

S1. Figura 1. Fluxograma da população e amostra elegíveis (Jujuy, 2009-2014).

S2. Figura 2. Prevalência de abaixo do peso por altitude geográfica e idade gestacional (Jujuy, 2009-2014).

LA, nível de baixa altitude; HA, nível de alta altitude.

S3. Figura 3. Prevalência de baixa estatura por altitude geográfica e idade gestacional (Jujuy, 2009-2014).

LA, nível de baixa altitude; HA, nível de alta altitude.

S4. Figura 4. Prevalência de emaciação por altitude geográfica e idade gestacional (Jujuy, 2009-2014).

LA, nível de baixa altitude; HA, nível de alta altitude.

S5 Tabela 1. Riscos brutos e ajustados de abaixo do peso, baixa estatura e emaciação associados à alta altitude (Jujuy, 2009-2014).

| FENÓTIPO | RC BRUTA (IC DE 95%) | RC AJUSTADA  (IC de 95%)a | Pb |
| --- | --- | --- | --- |
| Abaixo do peso | 1,92 (1,63 – 2,27) | 2,27 (1,76 – 2,92 | <0,001 |
| Baixa estatura | 2,21 (1,99 -2,45) | 1,82 (1,56 – 2,13) | <0,001 |
| Emaciação | 2,39 (2,18 – 2,62) | 2,77 (2,45 – 3,12) | <0,001 |

a Ajustado pela regressão logística (consulte covariável no texto).

b Para regressão logística.
